# Supplementary material for: Systematic Analysis of Gene Expression Alteration and Co-Expression Network of Eukaryotic Initiation Factor 4A-3 in Cancer
Source: PubMed Central journal article supplement — J Cancer. 2018 Nov 11;9(24):4568–77. doi: 10.7150/jca.27655 (PMC6299400; doi:10.7150/jca.27655), 2018-11-11
Supplement: jcav09p4568s1.pdf [file jcav09p4568s1.pdf]

**Supplementary Tables**

**Table 1: The significant changes of EIF4A3 mRNA expression in cancers**

| <b>Cancer</b>        | <b>Cancer subtype</b>                         | <b>P-value</b> | <b>Fold change</b> | <b>Rank (%)</b> | <b>Sample</b> |
|----------------------|-----------------------------------------------|----------------|--------------------|-----------------|---------------|
| Bladder Cancer       | Superficial Bladder Cancer                    | 7.17E-14       | 2.066              | 6               | 76            |
| Brain and CNS Cancer | Atypical Teratoid/Rhabdoid Tumor              | 5.00E-3        | 3.901              | 6               | 9             |
|                      | Malignant Glioma Anaplastic Oligoastrocytoma  | 2.30E-2        | 2.353              | 8               | 14            |
|                      | Invasive Ductal Breast Carcinoma              | 2.00E-2        | 2.337              | 6               | 10            |
| Breast Cancer        | Breast Carcinoma                              | 1.06E-10       | 2.127              | 2               | 39            |
| Head and Neck Cancer | Oral Cavity Carcinoma                         | 1.85E-6        | 2.541              | 1               | 26            |
|                      | Floor of the Mouth Carcinoma                  | 4.71E-6        | 2.847              | 3               | 27            |
|                      | Oropharyngeal Carcinoma                       | 9.69E-5        | 2.043              | 4               | 28            |
|                      | Tongue Carcinoma                              | 4.12E-5        | 2.152              | 7               | 37            |
|                      | Tongue Squamous Cell Carcinoma                | 3.41E-12       | 2.116              | 2               | 59            |
| Kidney Cancer        | Tongue Squamous Cell Carcinoma                | 2.50E-11       | 2.605              | 2               | 57            |
|                      | Renal Wilms Tumor                             | 6.00E-3        | 2.274              | 9               | 9             |
| Leukemia             | Chronic Lymphocytic Leukemia                  | 1.32E-9        | -2.148             | 3               | 59            |
|                      | B-Cell Childhood Acute Lymphoblastic Leukemia | 5.35E-4        | -4.127             | 7               | 242           |
|                      | T-Cell Childhood Acute Lymphoblastic Leukemia | 4.52E-4        | -3.575             | 9               | 50            |
|                      | Squamous Cell Lung Carcinoma                  | 1.41E-11       | 2.058              | 2               | 62            |
| Lung Cancer          | Small Cell Lung Carcinoma                     | 2.00E-3        | 2.602              | 3               | 10            |
|                      | Large Cell Lung Carcinoma                     | 5.00E-3        | 2.104              | 6               | 10            |
|                      | Squamous Cell Lung Carcinoma                  | 2.00E-3        | 2.335              | 9               | 19            |
| Lymphoma             | Anaplastic Large                              | 8.32E-4        | 3.097              | 10              | 46            |

|                      |                                                                       |         |       |   |    |
|----------------------|-----------------------------------------------------------------------|---------|-------|---|----|
| Pancreatic<br>Cancer | Cell Lymphoma,<br>ALK-Positive<br>Pancreatic Ductal<br>Adenocarcinoma | 1.27E-4 | 2.044 | 2 | 14 |
| Prostate Cancer      | Prostatic<br>Intraepithelial<br>Neoplasia Epithelia                   | 5.76E-4 | 2.785 | 6 | 34 |
|                      | Prostate Carcinoma<br>Epithelia                                       | 4.37E-4 | 2.289 | 7 | 52 |

---

**Table 2: The association of EIF4A3 expression and the prognosis value in cancer patients**

| <b>CANCER TYPE</b>        | <b>N</b> | <b>ENDPOINT</b>                  | <b>HR</b> | <b>CORRECTED P-VALUE</b> | <b>DATASET</b>  | <b>PROBE ID</b> |
|---------------------------|----------|----------------------------------|-----------|--------------------------|-----------------|-----------------|
| <b>Bladder cancer</b>     | 165      | Disease Specific Survival        | 0.99      | 9.48E-04                 | GSE13507        | ILMN_1667043    |
|                           | 165      | Overall Survival                 | 0.46      | 2.55E-03                 | GSE13507        | ILMN_1667043    |
| <b>Blood cancer</b>       | 559      | Disease Specific Survival        | 1.13      | 3.24E-04                 | GSE2658         | 201303_at       |
| <b>Brain cancer</b>       | 50       | Overall Survival                 | 0.35      | 1.69E-02                 | MGH-glioma      | 38031_at        |
| <b>Breast cancer</b>      | 200      | Distant Metastasis Free Survival | 0.80      | 3.06E-03                 | GSE11121        | 201303_at       |
|                           | 249      | Disease Free Survival            | 0.65      | 6.02E-03                 | GSE4922-GPL96   | 201303_at       |
|                           | 158      | Overall Survival                 | 0.23      | 2.31E-02                 | GSE3143         | 38031_at        |
| <b>Lung cancer</b>        | 204      | Relapse Free Survival            | 1.70      | 5.48E-04                 | GSE31210        | 201303_at       |
|                           | 204      | Overall Survival                 | 1.74      | 2.03E-03                 | GSE31210        | 201303_at       |
|                           | 104      | Overall Survival                 | 1.10      | 1.01E-02                 | jacob-00182-MSK | 201303_at       |
|                           | 129      | Overall Survival                 | 0.78      | 1.97E-02                 | GSE4573         | 201303_at       |
| <b>Soft tissue cancer</b> | 140      | Distant Recurrence Free Survival | 1.50      | 6.78E-03                 | GSE30929        | 201303_at       |

**Table 3: The alteration frequency and type of EIF4A3 in cancer study.**

| <b>Cancer</b>                                       | <b>Dataset</b>                | <b>N</b> | <b>Alteration<br/>Frequency<br/>(%)</b> | <b>TYPE (% N)</b>    |                          |                 |                                 |
|-----------------------------------------------------|-------------------------------|----------|-----------------------------------------|----------------------|--------------------------|-----------------|---------------------------------|
|                                                     |                               |          |                                         | <b>Amplification</b> | <b>Deep<br/>Deletion</b> | <b>Mutation</b> | <b>Multiple<br/>Alterations</b> |
| <b>Neuroendocrine<br/>Prostate<br/>Cancer(NEPC)</b> | Trento/Cornell/<br>Broad 2016 | 107      | 20.56                                   | 20.56(22)            | 0                        | 0               | 0                               |
| <b>Breast Cancer</b>                                | The MBC<br>Project            | 103      | 15.53                                   | 10.68(11)            | 3.88(4)                  | 0(0)            | 0.97(1)                         |
| <b>Pancreatic<br/>Cancer</b>                        | UTSW                          | 109      | 10.09                                   | 7.34(8)              | 2.75(3)                  | 0               | 0                               |
| <b>Liver</b>                                        | TCGA                          | 366      | 7.1                                     | 6.28(23)             | 0.27(1)                  | 0.55(2)         | 0                               |
| <b>Ovarian</b>                                      | TCGA                          | 316      | 6.96                                    | 6.33(20)             | 0.32(1)                  | 0.32(1)         | 0                               |
| <b>CCLE</b>                                         | Novartis/Broad<br>2012        | 995      | 6.23                                    | 5.93(59)             | 0.3(3)                   | 0               | 0                               |
| <b>Breast Cancer</b>                                | TCGA                          | 963      | 6.23                                    | 5.71(55)             | 0.42(4)                  | 0               | 0.1(1)                          |
| <b>Melanoma</b>                                     | TCGA                          | 287      | 5.92                                    | 4.88(14)             | 0                        | 1.05(3)         | 0                               |
| <b>Breast Cancer</b>                                | METABRIC                      | 2051     | 5.75                                    | 5.75(118)            | 0                        | 0               | 0                               |

**Table 4: The alteration frequency and type of EIF4A3 in cancer type.**

| Cancer                               | N    | Alteration<br>Frequency<br>(%) | TYPE (% N)        |                  |          |                         |
|--------------------------------------|------|--------------------------------|-------------------|------------------|----------|-------------------------|
|                                      |      |                                | Amplificati<br>on | Deep<br>Deletion | Mutation | Multiple<br>Alterations |
| <b>Prostate Cancer, NOS</b>          | 65   | 18.46                          | 18.46(12)         | 0                | 0        | 0                       |
| <b>Cancer of<br/>Unknown Primary</b> | 1181 | 5.25                           | 5(59)             | 0.25(3)          | 0        | 0                       |
| <b>Breast Cancer</b>                 | 4966 | 4.23                           | 4.01(199)         | 0.08(4)          | 0.1(5)   | 0.04(2)                 |
| <b>Ovarian Cancer</b>                | 551  | 3.99                           | 3.63(20)          | 0.18(1)          | 0.18(1)  | 0                       |
| <b>Melanoma</b>                      | 1140 | 2.02                           | 1.58(18)          | 0                | 0.44(5)  | 0                       |
| <b>Hepatobiliary Cancer</b>          | 1398 | 2                              | 1.72(24)          | 0.07(1)          | 0.21(3)  | 0                       |
| <b>Adrenocortical<br/>Carcinoma</b>  | 114  | 1.75                           | 1.75(2)           | 0                | 0        | 0                       |
| <b>Endometrial<br/>Cancer</b>        | 538  | 1.67                           | 1.12(6)           | 0                | 0.56(3)  | 0                       |
| <b>Soft Tissue<br/>Sarcoma</b>       | 932  | 1.5                            | 1.39(13)          | 0                | 0.11(1)  | 0                       |
| <b>Pheochromocytoma</b>              | 140  | 1.43                           | 1.43(2)           | 0                | 0        | 0                       |
| <b>Mesothelioma</b>                  | 211  | 1.42                           | 1.42(2)           | 0                | 0        | 0                       |
| <b>Cervical Cancer</b>               | 241  | 1.24                           | 0.41(1)           | 0.41(1)          | 0.41(1)  | 0                       |
| <b>Bladder Cancer</b>                | 1046 | 1.15                           | 0.48(5)           | 0.1(1)           | 0.57(6)  | 0                       |

**Table 5: The co-expression partners of EIF4A3.**

| <b>Gene</b>   | <b>Co-expression partners</b>                                                                                                                                                                                                                                                                                                                                                                                                                                                                                                                                                                                                                                                                                                                                                                                                                                                                                                                                                                                                                                                                                                                                                                                                                                                                                                                                                                                                                                                                                                                                                                                                                                                                                                                                                                                                                                                                                                                                                                                                                                                                                                                                                                                                                                                                                                                   |
|---------------|-------------------------------------------------------------------------------------------------------------------------------------------------------------------------------------------------------------------------------------------------------------------------------------------------------------------------------------------------------------------------------------------------------------------------------------------------------------------------------------------------------------------------------------------------------------------------------------------------------------------------------------------------------------------------------------------------------------------------------------------------------------------------------------------------------------------------------------------------------------------------------------------------------------------------------------------------------------------------------------------------------------------------------------------------------------------------------------------------------------------------------------------------------------------------------------------------------------------------------------------------------------------------------------------------------------------------------------------------------------------------------------------------------------------------------------------------------------------------------------------------------------------------------------------------------------------------------------------------------------------------------------------------------------------------------------------------------------------------------------------------------------------------------------------------------------------------------------------------------------------------------------------------------------------------------------------------------------------------------------------------------------------------------------------------------------------------------------------------------------------------------------------------------------------------------------------------------------------------------------------------------------------------------------------------------------------------------------------------|
| <b>EIF4A3</b> | HEXIM1, TUBB4B, IFRD1, NXF1, KLHL21, NDRG1, SLC16A1, EIF5, GADD45B, ENC1, PGK1, CDKN1A, RAN, PNP, SRSF2, HPSE, KPNA2, ENO1, XRCC6, TGM1, DNAJA1, IL36G, SLC25A44, PFDN2, IL36RN, SERPINB13, ALYREF, ILF2, SNRNP25, GLA, HNRNPAB, SLC5A1, PDZK1IP1, KDM6B, SPTLC2, SUMO2, PHB, CCT7, SLC20A1, ARL6IP1, UHRF1, PSMA3, MRPL18, PLBD1, PPIF, SOD2, GSPT1, UBE2S, POLR2L, AURKA, ISCA1, NAMPT, KIF20A, MRPL15, HSPA2, RFC2, SLC38A2, MPZL2, ACAD9, NDUFS3, PPP2CA, IPO7, PSMB1, ABCA12, RFC4, PLAUR, UAP1, PSMB5, MAT2A, PRDX1, ZNF331, NR4A3, SLC2A3, HIGD1A, TUBB6, C20orf24, MPHOSPH6, KLK13, YWHAQ, CYB5D1, ATP1B3, POLR3K, AHSA1, C6orf120, GABPB1, SUSDB, KLHL15, TCN1, PSMA5, ASF1B, EIF2S1, CCNH, S100A12, SIVA1, USP39, CREM, CCT3, SERTAD1, ALOX12B, NOLC1, C1QBP, CHST7, CYB5R3, PRMT5, OAT, NOP56, HSP90AB1, TIMELESS, NOD2, ZC3H12A, CARHSP1, AGO2, NFATC1, RLIM, ARC, CH25H, TOB2, PSMB6, TMEM11, PPRC1, FABP5, SKP2, MRPS23, GDPD3, H2AFX, TAGLN2, MYC, GCLM, PSMD14, PPP2R1B, RRS1, UFD1L, PSMB2, MRPL11, GM2A, MCM10, ADRM1, LCN2, TUBB2A, MRPS7, DDX1, TMSB10, IDH3A, IL6, SPSB1, NR4A1, RAC1, CD24, FAM83B, SLC41A1, POLE, DHX15, TIPARP, MXD1, XRCC5, MRPL17, NELFCD, TSC22D2, LRRC59, PIM1, POLE2, CYCS, WDR1, UBR7, NDUFC1, HNRNPC, NHP2, PTTG1, H2AFX, HSP90AA1, PPP1CA, NFKBID, PCNA, LLPH, MMP19, MAFF, NOP10, MT2A, ELAVL1, COX8A, SRP68, FAM98A, HIRIP3, CHD1, TUBG1, TMEM165, HAT1, SOD1, RPP30, PSMD11, NFIL3, ATP5J2, TFDP1, GSTO1, CSE1L, DNTTIP2, HSPE1, HSPA9, CDK16, MAP2K3, FOXK2, HTATSF1, LMNA, CLCA2, EIF3J, TMEM70, VOPP1, FEN1, RPF2, MAPKAPK2, CCT5, CLCF1, TREX2, HRAS, SLIRP, ECHS1, EFTUD2, MYBL2, EXOSC2, NDUFV2, YWHAH, TXNDC17, SOCS3, NME1, ARPC2, ABL2, RRP36, AIMP2, UCHL3, SLC1A5, RAB38, RAE1, LBHD1, CENPO, C18orf8, HMOX2, C8orf33, NSDHL, NUP85, CNFN, UCK2, ETF1, PFKFB3, VBP1, PPP1R15B, VPS37B, RPA3, KLK10, VDAC3, SPR, SLC25A5, ARID5A, C10orf99, PREP, EXOSC5, TNFRSF10D, LSM3, ADSL, CDC123, BAG3, VDAC2, HSPD1, LITAF, GTPBP4, ANAPC11, AKR1B10, FOSL1, MDH2, TRIB1, CD55, DNAJC9, PARP1, SYNCRIP, TPI1, C11orf96, TUBB3, MAD2L1, UQCRQ, CLDN1, UBE2A, TEAD4, MRPL3, RIOK1, PSMB3, KARS, SIRT1, SRSF3, PDLIM4, CGA, ADM, SERPINB1, CIRH1A, PSME3, ESF1, CDCA4, ACP1, ATP1B1, TOB1, LDHA, DDX23, ANXA7, NHP2L1, HSPA4, TRIP13, GNL2, PSMD1, TIMM23, EIF5B, CDK1, RUVBL2, LSM4, TIMM17A |

**Table 6: The enrichment of include neoplasm MeSH terms among the EIF4A3 co-expression network (TOP 5).**

| Rank | MeSH heading                                         | GEO Series                                                                                                                                                                                              | links | Co-expressed Genes                                                                                                                                                                                                                                                                                                                                                                           | Score* |
|------|------------------------------------------------------|---------------------------------------------------------------------------------------------------------------------------------------------------------------------------------------------------------|-------|----------------------------------------------------------------------------------------------------------------------------------------------------------------------------------------------------------------------------------------------------------------------------------------------------------------------------------------------------------------------------------------------|--------|
| 1    | Precursor Cell<br>Lymphoblastic<br>Leukemia-Lymphoma | GSE653<br>GSE2351<br>GSE650<br>GSE657<br>GSE3911<br>GSE34670<br>GSE11877<br>GSE13425<br>GSE649<br>GSE658<br>GSE635<br>GSE13351<br>GSE655<br>GSE659<br>GSE654<br>GSE643<br>GSE648<br>GSE2842<br>GSE17195 | 47    | HEXIM1、 TUBB4B<br>IFRD1、 NXF1<br>KLHL21、 NDRG1<br>SLC16A1、 EIF5<br>GADD45B、 ENC1<br>CDKN1A、 PNP<br>SLC20A1、 ARL6IP1<br>SOD2、 ISCA1<br>HSPA2、 SLC38A2<br>IPO7、 GLA<br>SUSD6、 CHST7<br>OAT、 NOP56<br>TOB2、 FABP5<br>DNAJA1、 TUBB2A<br>NR4A1、 H2AFX<br>KDM6B、 PPP1CA<br>SUMO2、 MAP2K3<br>SLC1A5、 C18orf8<br>CD55、 TUBB3<br>UBE2A、 SLC2A3<br>SIRT1、 ADM<br>NR4A3、 ATP1B1<br>TOB1、 LDHA<br>TRIP13 | 217.26 |
| 2    | Daunorubicin                                         | GSE653<br>GSE2351<br>GSE650<br>GSE657<br>GSE649<br>GSE658<br>GSE635<br>GSE655<br>GSE659<br>GSE654<br>GSE643<br>GSE648                                                                                   | 39    | HEXIM1、 IFRD1<br>NDRG1、 KLHL21<br>NXF1、 SLC16A1<br>TUBB4B、 EIF5<br>ENC1、 GADD45B<br>CDKN1A、 PNP<br>SOD2、 ISCA1<br>HSPA2、 IPO7<br>GLA、 CHST7<br>OAT、 NOP56<br>FABP5、 TUBB2A<br>NR4A1、 KDM6B<br>MAP2K3、 SLC1A5<br>C18orf8、 ARL6IP1<br>SLC38A2、 CD55<br>UBE2A、 SLC2A3<br>SIRT1、 SLC20A1<br>ADM、 NR4A3<br>ATP1B1、 TOB1<br>LDHA                                                                   | 169.95 |
| 3    | Ovarian Neoplasms                                    | GSE23553<br>GSE27651                                                                                                                                                                                    | 32    | ACAD9、 NDUFS3<br>POLR3K、 SNRNP25                                                                                                                                                                                                                                                                                                                                                             | 55.75  |

|   |                  |                                  |    |                                                                                                                                                                                                                                                                                                                                                                                                                                                                                                         |       |
|---|------------------|----------------------------------|----|---------------------------------------------------------------------------------------------------------------------------------------------------------------------------------------------------------------------------------------------------------------------------------------------------------------------------------------------------------------------------------------------------------------------------------------------------------------------------------------------------------|-------|
| 4 | Cisplatin        | GSE23553<br>GSE14209             | 31 | SIVA1, USP39<br>TIMELESS,<br>TMEM11<br>MRPS23, PHB<br>H2AFZ, MCM10<br>MRPS7, MRPL17<br>NELFCD, POLE2<br>UBR7, FAM98A<br>UHRF1, VOPP1<br>FEN1, HRAS<br>SLIRP, ECHS1<br>EFTUD2, MYBL2<br>TXNDC17, RRP36<br>LBHD1, CENPO<br>NUP85, SPR<br>ACAD9, NDUFS3<br>POLR3K, SNRNP25<br>SIVA1, USP39<br>TIMELESS,<br>TMEM11<br>MCM10, MRPS7<br>MRPL17, NELFCD<br>POLE2, UBR7<br>FAM98A, UHRF1<br>VOPP1, FEN1<br>HRAS, SLIRP<br>ECHS1, EFTUD2<br>MYBL2, TXNDC17<br>RRP36, LBHD1<br>CENPO, NUP85<br>UCK2, SPR<br>TEAD4 | 52.45 |
| 5 | Breast Neoplasms | GSE10843<br>GSE39976<br>GSE10911 | 22 | ASF1B, POLE<br>CDK16, CDCA4<br>DNAJA1, PSMB2<br>DDX1, RAC1<br>XRCC5, LRRC59<br>SRSF2, ELAVL1<br>TFDP1, CSE1L<br>MRPL15, RAN<br>C8orf33, MRPL18<br>AHSA1, SRSF3<br>PSMD1, TIMM17A                                                                                                                                                                                                                                                                                                                        | 40.14 |

---

**\*The enrichment of MeSH terms among the co-expressions is measured by the summation of *LLS*s from all supportive GSEs that are indexed by the MeSH terms.**
